# Supplementary material for: Novel Lom-dh Genes Play Potential Role in Promoting Egg Diapause of Locusta migratoria L
Source: Front Physiol. 2019 Jun 18;10:767. doi: 10.3389/fphys.2019.00767 (PMC6591537; doi:10.3389/fphys.2019.00767)
Supplement: TABLE S1 — Candidate pban/capa family gene sequences of the L. migratoria genome contigs. [file Table_1.DOCX]

**Table S1 Candidate *pban/capa* gene sequences of *Locusta migratoria* L. genome contigs**

| Query | Database | Total | Genome file |
| --- | --- | --- | --- |
| gi|751776732|ref|XP_011197340.1| | gb|AVCP010037508.1| | 122 | AVCP01.fsa.1 |
| gi|310616640|tpg|DAA33896.1| | gb|AVCP010060505.1| | 109 | AVCP01.fsa.1 |
| gi|752879401|ref|XP_011257226.1| | gb|AVCP010159522.1|(TPK4) | 103 | AVCP01.fsa.2 |
| gi|500862|dbj|BAA03755.1| | gb|AVCP010159529.1|(TPK3) | 162 | AVCP01.fsa.2 |
| gi|478261721|gb|AGI96545.1| | gb|AVCP010201651.1| | 105 | AVCP01.fsa.3 |
| gi|347810662|gb|AEP25400.1| | gb|AVCP010272810.1| | 190 | AVCP01.fsa.3 |
| gi|728891537|gb|AIY99907.1| | gb|AVCP010299128.1| | 112 | AVCP01.fsa.4 |
| gi|3341394|emb|CAA08774.1| | gb|AVCP010303494.1| | 102 | AVCP01.fsa.4 |
| gi|746851984|ref|XP_011056531.1| | gb|AVCP010343123.1| | 112 | AVCP01.fsa.4 |
| gi|30984070|gb|AAP41132.1| | gb|AVCP010410303.1|(TPK2) | 192 | AVCP01.fsa.5 |
| gi|27657760|gb|AAO18192.1| | gb|AVCP010410310.1|(TPK5) | 168 | AVCP01.fsa.5 |
| gi|768425305|ref|XP_011553647.1| | gb|AVCP010480295.1| | 102 | AVCP01.fsa.5 |
| gi|815806702|ref|XP_012224133.1| | gb|AVCP010538049.1| | 110 | AVCP01.fsa.6 |
| gi|815806702|ref|XP_012224133.1| | gb|AVCP010586161.1| | 124 | AVCP01.fsa.6 |
| gi|768425305|ref|XP_011553647.1| | gb|AVCP010629157.1| | 126 | AVCP01.fsa.7 |
| gi|646707069|gb|KDR13989.1| | gb|AVCP010654946.1| | 115 | AVCP01.fsa.7 |
| gi|815806702|ref|XP_012224133.1| | gb|AVCP010797131.1| | 106 | AVCP01.fsa.8 |
| gi|357611058|gb|EHJ67284.1| | gb|AVCP010817043.1| | 111 | AVCP01.fsa.9 |
| gi|194142651|gb|EDW59054.1| | gb|AVCP010869438.1| | 103 | AVCP01.fsa.9 |
| gi|194142651|gb|EDW59054.1| | gb|AVCP010869439.1| | 103 | AVCP01.fsa.9 |
| gi|74800397|sp|Q7PTL2.2|PBAN_ANOGA | gb|AVCP010875633.1| | 130 | AVCP01.fsa.9 |
| gi|62766017|gb|AAX99220.1| | gb|AVCP010882506.1|(TPK1) | 148 | AVCP01.fsa.9 |
| gi|357611058|gb|EHJ67284.1| | gb|AVCP010991511.1| | 106 | AVCP01.fsa.10 |
| gi|751776732|ref|XP_011197340.1| | gb|AVCP011074633.1| | 109 | AVCP01.fsa.11 |
| gi|466524|dbj|BAA05954.1| | gb|AVCP011075735.1| | 159 | AVCP01.fsa.11 |
| gi|728891537|gb|AIY99907.1| | gb|AVCP011104938.1| | 132 | AVCP01.fsa.11 |
| gi|307179436|gb|EFN67760.1| | gb|AVCP010159522.1| | 103 | AVCP01.fsa.2 |
| Lom-PK-2 | gb|AVCP010267064.1| | 10 | AVCP01.fsa.3 |
| gb|GCGJ01044456.1|(Lom-pban) | gb|AVCP011098992.1| | | AVCP01.fsa.11 |
|  | gb|AVCP011098990.1| | |  |
| gb|GCGJ01004763.1|(Lom-capa) | gb|AVCP011143372.1| | | AVCP01.fsa.12 |
|  | gb|AVCP011143377.1| | |  |
|  | gb|AVCP011143364.1| | |  |
|  | gb|AVCP011143367.1| | |  |
